# Supplementary material for: Wider collateral damage to children in the UK because of the social distancing measures designed to reduce the impact of COVID-19 in adults
Source: PubMed Central journal article supplement — BMJ Paediatr Open. 2020 May 4;4(1):e000701. doi: 10.1136/bmjpo-2020-000701 (PMC7223269; doi:10.1136/bmjpo-2020-000701), 2020-05-04
Supplement: bmjpo-2020-000701.draft_revisions.pdf [file bmjpo-2020-000701.draft_revisions.pdf]

# BMJ Paediatrics Open

BMJ Paediatrics Open is committed to open peer review. As part of this commitment we make the peer review history of every article we publish publicly available.

When an article is published we post the peer reviewers' comments and the authors' responses online. We also post the versions of the paper that were used during peer review. These are the versions that the peer review comments apply to.

The versions of the paper that follow are the versions that were submitted during the peer review process. They are not the versions of record or the final published versions. They should not be cited or distributed as the published version of this manuscript.

BMJ Paediatrics Open is an open access journal and the full, final, typeset and author-corrected version of record of the manuscript is available on our site with no access controls, subscription charges or pay-per-view fees (<http://bmjpaedsopen.bmj.com>).

If you have any questions on BMJ Paediatrics Open's open peer review process please email [info.bmjpo@bmj.com](mailto:info.bmjpo@bmj.com)

# BMJ Paediatrics Open

## The wider collateral damage to children because of the social distancing measures designed to reduce the impact of COVID-19 in adults.

|                               |                                                                                                                                                                                                                                                                                                                                                                                                                                   |
|-------------------------------|-----------------------------------------------------------------------------------------------------------------------------------------------------------------------------------------------------------------------------------------------------------------------------------------------------------------------------------------------------------------------------------------------------------------------------------|
| Journal:                      | <i>BMJ Paediatrics Open</i>                                                                                                                                                                                                                                                                                                                                                                                                       |
| Manuscript ID                 | bmjpo-2020-000701                                                                                                                                                                                                                                                                                                                                                                                                                 |
| Article Type:                 | Editorial                                                                                                                                                                                                                                                                                                                                                                                                                         |
| Date Submitted by the Author: | 13-Apr-2020                                                                                                                                                                                                                                                                                                                                                                                                                       |
| Complete List of Authors:     | Crawley, Esther; University of Bristol School of Social and Community Medicine, Centre for Child and Adolescent Health<br>Loades, Maria; University of Bath, Department of Psychology<br>Feder, Gene; University of Bristol Faculty of Health Sciences, Academic Primary Care<br>Logan, Stuart; University of Exeter Medical School, Child Health<br>Redwood, Sabi; University of Bristol<br>macleod, john; University of Bristol |
| Keywords:                     | Epidemiology, Adolescent Health, Child Abuse                                                                                                                                                                                                                                                                                                                                                                                      |
|                               |                                                                                                                                                                                                                                                                                                                                                                                                                                   |

SCHOLARONE™  
Manuscripts

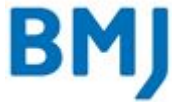

I, the Submitting Author has the right to grant and does grant on behalf of all authors of the Work (as defined in the below author licence), an exclusive licence and/or a non-exclusive licence for contributions from authors who are: i) UK Crown employees; ii) where BMJ has agreed a CC-BY licence shall apply, and/or iii) in accordance with the terms applicable for US Federal Government officers or employees acting as part of their official duties; on a worldwide, perpetual, irrevocable, royalty-free basis to BMJ Publishing Group Ltd ("BMJ") its licensees and where the relevant Journal is co-owned by BMJ to the co-owners of the Journal, to publish the Work in this journal and any other BMJ products and to exploit all rights, as set out in our [licence](#).

The Submitting Author accepts and understands that any supply made under these terms is made by BMJ to the Submitting Author unless you are acting as an employee on behalf of your employer or a postgraduate student of an affiliated institution which is paying any applicable article publishing charge ("APC") for Open Access articles. Where the Submitting Author wishes to make the Work available on an Open Access basis (and intends to pay the relevant APC), the terms of reuse of such Open Access shall be governed by a Creative Commons licence – details of these licences and which [Creative Commons](#) licence will apply to this Work are set out in our licence referred to above.

Other than as permitted in any relevant BMJ Author's Self Archiving Policies, I confirm this Work has not been accepted for publication elsewhere, is not being considered for publication elsewhere and does not duplicate material already published. I confirm all authors consent to publication of this Work and authorise the granting of this licence.

## The wider collateral damage to children because of the social distancing measures designed to reduce the impact of COVID-19 in adults.

*Esther Crawley,<sup>1</sup> Maria Loades,<sup>1</sup> Gene Feder,<sup>2</sup> Stuart Logan,<sup>3</sup> Sabi Redwood,<sup>4</sup> John Macleod<sup>4</sup>*

<sup>1</sup>Centre for Academic Child Health  
1-5 Whiteladies Road, BS8 1NU  
Bristol Medical School

<sup>2</sup>Centre for Academic Primary Care, Bristol Medical School, Bristol  
<sup>3</sup>University of Exeter, Exeter

<sup>4</sup>ARC West, Bristol

Paediatricians are increasingly concerned that parental worries over visiting hospitals is leading to the late presentation of serious illness in children causing avoidable deaths, a form of collateral damage from the COVID-19 emergency. In Italy, hospital statistics show a substantial decrease in paediatric emergency visits compared to the same time in 2018 and 2019 of between 73 and 78%.<sup>[1]</sup> In April 2020, both the Clinical Commissioning Groups and the Royal College of Paediatrics and Child Health provided guidance for General Practitioners and paediatricians in England that the threshold for face to face assessment hospital referrals in children should not change because of the Covid19 pandemic.<sup>[2]</sup> This intervention is welcome, however we remain concerned about wider, perhaps less immediately visible collateral damage of strategies used against COVID-19 on vulnerable children.

The Cambridge dictionary defines collateral damage is the “unintentional deaths and injuries of people who are not soldiers, and damage that is caused to their homes, hospitals, schools, etc.” In the fight against Coronavirus, children are being put at risk, in order to reduce the spread of a disease that mainly causes direct harm to adults.

One of the unique characteristics of the Covid-19 pandemic is the low hospitalisation and mortality rate (<0.2% for teenagers).<sup>[3]</sup> However, children are experiencing additional risks due to social isolation, lack of protective school placements, increased anxiety and a drop in service provision from both the NHS and social services. This is particularly true for the most vulnerable children.

### Impact of school closure and social isolation

School closures have a limited impact on preventing deaths in adults.<sup>[4]</sup> However, the closure of schools and confinement to home has multiple impacts on children in terms of education, social isolation, wellbeing and child protection. Schools throughout the UK closed in March 2020 and are only providing places for some primary school children of key workers and some vulnerable children. Uptake of these places in the latter group appears to be low.<sup>[5]</sup> Some schools are providing learning online, but completion rates are unknown, particularly for those children with no or limited access to the internet. Children with Special Educational Needs and Disabilities should have the special provision required to meet their particular needs specified in their Education Health and Care Plan, EHCP. This has not necessarily been adapted for home learning and many EHCPs specify provision that cannot be delivered outside of specialist settings. Similarly, much of the wider support normally available to disabled children and other vulnerable learners is provided through facilities that are now closed. and unlikely to be effectively replaced by efforts of volunteers.

Schools provide a safe space for vulnerable children and play a key role in safeguarding by detecting signs of abuse or neglect. The rapid closure of schools, has not been accompanied by strengthened

1  
2  
3 processes to support those most in need. This has occurred at the same time that the Coronavirus  
4 Act allows social services to reduce or suspend services (see below) leaving vulnerable children  
5 without a safety net.  
6

7 Social isolation, the withdrawal of peer support, the lack of structure and support from school and  
8 the increased anxiety over Covid-19 infection and risk to parents, are all likely to have a negative  
9 impact on mental health in children and young people.[6] Social isolation and loneliness may lead to  
10 subsequent mental health problems (Chatburn et al, in prep), resulting in a substantial increase in  
11 need for Child and Adolescent Mental Health Services.  
12  
13

14 Increased risk to the mental health of children from social isolation will also result from their  
15 exposure to domestic violence and abuse (DVA) during the pandemic. We know that violence against  
16 women increases during epidemics, such as Ebola.[7] Now, in countries across the world that have  
17 imposed social isolation in response to COVID-19, there is evidence from helplines and police reports  
18 that the incidence and severity of DVA has increased.[8-10] Children confined to home from school  
19 closure and young people not being able to leave home to see their friends will be more exposed to  
20 DVA. The stress and anxiety caused by forced isolation, economic uncertainty, home schooling, and  
21 potentially difficult living conditions, drive the increase in abusive and controlling behaviour. In over  
22 a third of families where DVA occurs, there is also direct child maltreatment: physical and emotional  
23 abuse, exploitation and neglect.[11] The greatest risk will be to vulnerable children. Although the  
24 Government has issued guidance in relation to COVID-19 and DVA, there is no mention of exposed  
25 children and young people.[9] Moreover, as children's services and DVA agencies scramble to  
26 change their working practices to remote support, there is uncertainty about the effectiveness of  
27 emergency methods of working in this field.  
28  
29  
30  
31

### 32 **Reduction in protection: withdrawal of services**

33 Whilst the risk to children (and particularly vulnerable children) is increasing, the support  
34 mechanisms in both the NHS and social services are being withdrawn.  
35

36 Hospital outpatient clinics have closed, been suspended or moved to virtual home based clinics. This  
37 will have the greatest impact on new appointments, or appointments requiring an examination.  
38 Child and Adolescent Mental health services have reduced or suspended assessment and treatment  
39 clinics in many parts of the UK at a time when children and young people are experiencing higher  
40 levels of anxiety and depression. This is likely to contribute to higher rates of mental health disorders,  
41 self harm and ultimately suicide. The impact is higher on vulnerable children  
42  
43

44 On the 3<sup>rd</sup> of March, the UK government introduced the Coronavirus Bill.[12] This included changes  
45 to the Care Act 2014 in England and the Social Services and Well-being (Wales) Act 2014 to "*enable*  
46 *local authorities to prioritise the services they offer in order to ensure the most urgent and serious*  
47 *care needs are met, even if this means not meeting everyone's assessed needs in full or delaying*  
48 *some assessments.*"[12] These changes meant that "Local Authorities will not have to prepare or  
49 review care and support plans".[13] The intention of the bill was for this to only come into effect if  
50 "if demand pressures and workforce illness during the pandemic meant that local authorities were  
51 at imminent risk of failing to fulfil their duties and only last the duration of the emergency".[13]  
52 However, in the absence of coronavirus testing (which means that many families are self isolating)  
53 and with current government regulations on the movement of people, significant areas of social care  
54 have ceased with a potentially devastating impact on the most vulnerable children.  
55  
56  
57

58 There are over 78,000 looked after children in England alone[14] who are now at higher risk because  
59 of the reduction or suspension of evidenced based protective support and interventions. A variety of  
60

parental interventions, Looked after Children reviews, Social services input and respite care can improve children's outcomes.[15] Throughout the UK, these services have been suspended or reduced as Social services move to working from home meaning that children and foster carers can no longer access face to face support from their appointed social worker or their independent reviewing officer. Respite care has been suspended, increasing the risk of physical, emotional abuse or neglect in families that are struggling. Where looked after children were receiving additional support from CAMHS, this has either stopped or is being continued remotely. Inevitably these reductions in support and safeguards will have the greatest impact on the children with the most complex needs in the most challenged placements. Transition planning for children leaving care has essentially been suspended. Services that were already struggling with workforce issues are now struggling even more as recruitment is almost impossible currently because of practical and economic considerations.

Can we mitigate these effects and minimise the "collateral damage" experienced by children and young people? Several strategies have been suggested to reduce the risks of domestic violence including the organisation of safe spaces in hotels for women and children experiencing DVA, already implemented in Spain and France. Improving video and online access to services for which there is some evidence of effectiveness (such as CBT from CAMHS) could improve children's resilience. The chronic underfunding and work-force crisis in social care and the domestic violence sector will only be exacerbated by the current emergency. The chancellor's recognition of the need for greater financial support of the NHS [16] should be matched with additional support to local authorities. CAMHS and social services for children are unlikely to be needed on the front line for Covid-19 and agile services could develop alternative methods to assess and treat children using video clinics. But perhaps more importantly, we all have a responsibility to promote the health and well being of children at home, and to ask questions and fight for service provision in areas where clinicians are not needed to fight Covid-19, but are needed to protect children.

1. Lazzarini, M., et al., *Delayed access or provision of care in Italy resulting from fear of COVID-19*. *Lancet Child Adolesc Health*, 2020.
2. Health, R.C.o.P.a.C. *Delayed access to care for children during COVID-19: our role as paediatricians - position statement*. 2020; Available from: <https://www.rcpch.ac.uk/resources/delayed-presentation-during-covid-19-position>.
3. Choi, S.H., et al., *Epidemiology and Clinical Features of Coronavirus disease 2019 in Children*. *Clin Exp Pediatr*, 2020.
4. Viner, R.M., et al., *School closure and management practices during coronavirus outbreaks including COVID-19: a rapid systematic review*. *Lancet Child Adolesc Health*, 2020.
5. *Low attendance at scaled-down schools sparks fears for vulnerable pupils in The Guardian* 2020.
6. Sprang, G. and M. Silman, *Posttraumatic stress disorder in parents and youth after health-related disasters*. *Disaster Med Public Health Prep*, 2013. **7**(1): p. 105-10.
7. Caspani, M., *Violence against women rises in Ebola-hit nations: ministers*, in *Reuters*. 2015.
8. *Lockdowns around the world bring rise in domestic violence*, in *The Guardian*.
9. *In quarantine with an abuser; urge in domestic violence reports linked to coronavirus*, in *The Guardian*.
10. *Domestic abuse cases soar as lockdown takes its toll*, in *The Guardian*. 2020.
11. Chiesa, A.E., et al., *Intimate partner violence victimization and parenting: A systematic review*. *Child Abuse Negl*, 2018. **80**: p. 285-300.
12. *What the Coronavirus Bill will do*, D.o.H.a.S. Care, Editor. 2020.
13. *CareAct easements: guidance for local authorities* D.o.H.a.S. Care, Editor.

- 1
  - 2
  - 3
  - 4
  - 5
  - 6
  - 7
  - 8
  - 9
  - 10
  - 11
  - 12
  - 13
  - 14
  - 15
  - 16
  - 17
  - 18
  - 19
  - 20
  - 21
  - 22
  - 23
  - 24
  - 25
  - 26
  - 27
  - 28
  - 29
  - 30
  - 31
  - 32
  - 33
  - 34
  - 35
  - 36
  - 37
  - 38
  - 39
  - 40
  - 41
  - 42
  - 43
  - 44
  - 45
  - 46
  - 47
  - 48
  - 49
  - 50
  - 51
  - 52
  - 53
  - 54
  - 55
  - 56
  - 57
  - 58
  - 59
  - 60
14. Statistics, N., *Children looked after in England (including adoption), year ending 31 March 2019*, D.f. Education, Editor. 2019.
15. Lester, S.L., T; sutcliffe, K; Khatwa,M; Sowden,A; , *What helps to support people affected by Adverse Childhood Experiences? A Review of Evidence*. 2019, . London: EPPI-Centre, Social Science Research Unit, UCL Institute of Education, University College London.
16. Gov.UK, *NHS to benefit from £13.4 billion debt write-off: Press release*. 2020.

Confidential: For Review Only

# BMJ Paediatrics Open

**The wider collateral damage to children in the UK because of the social distancing measures designed to reduce the impact of COVID-19 in adults.**

|                               |                                                                                                                                                                                                                                                                                                                                                                                                                                   |
|-------------------------------|-----------------------------------------------------------------------------------------------------------------------------------------------------------------------------------------------------------------------------------------------------------------------------------------------------------------------------------------------------------------------------------------------------------------------------------|
| Journal:                      | <i>BMJ Paediatrics Open</i>                                                                                                                                                                                                                                                                                                                                                                                                       |
| Manuscript ID                 | bmjpo-2020-000701.R1                                                                                                                                                                                                                                                                                                                                                                                                              |
| Article Type:                 | Editorial                                                                                                                                                                                                                                                                                                                                                                                                                         |
| Date Submitted by the Author: | 24-Apr-2020                                                                                                                                                                                                                                                                                                                                                                                                                       |
| Complete List of Authors:     | Crawley, Esther; University of Bristol School of Social and Community Medicine, Centre for Child and Adolescent Health<br>Loades, Maria; University of Bath, Department of Psychology<br>Feder, Gene; University of Bristol Faculty of Health Sciences, Academic Primary Care<br>Logan, Stuart; University of Exeter Medical School, Child Health<br>Redwood, Sabi; University of Bristol<br>macleod, john; University of Bristol |
| Keywords:                     | Epidemiology, Adolescent Health, Child Abuse                                                                                                                                                                                                                                                                                                                                                                                      |
|                               |                                                                                                                                                                                                                                                                                                                                                                                                                                   |

SCHOLARONE™  
Manuscripts





I, the Submitting Author has the right to grant and does grant on behalf of all authors of the Work (as defined in the below author licence), an exclusive licence and/or a non-exclusive licence for contributions from authors who are: i) UK Crown employees; ii) where BMJ has agreed a CC-BY licence shall apply, and/or iii) in accordance with the terms applicable for US Federal Government officers or employees acting as part of their official duties; on a worldwide, perpetual, irrevocable, royalty-free basis to BMJ Publishing Group Ltd ("BMJ") its licensees and where the relevant Journal is co-owned by BMJ to the co-owners of the Journal, to publish the Work in this journal and any other BMJ products and to exploit all rights, as set out in our [licence](#).

The Submitting Author accepts and understands that any supply made under these terms is made by BMJ to the Submitting Author unless you are acting as an employee on behalf of your employer or a postgraduate student of an affiliated institution which is paying any applicable article publishing charge ("APC") for Open Access articles. Where the Submitting Author wishes to make the Work available on an Open Access basis (and intends to pay the relevant APC), the terms of reuse of such Open Access shall be governed by a Creative Commons licence – details of these licences and which [Creative Commons](#) licence will apply to this Work are set out in our licence referred to above.

Other than as permitted in any relevant BMJ Author's Self Archiving Policies, I confirm this Work has not been accepted for publication elsewhere, is not being considered for publication elsewhere and does not duplicate material already published. I confirm all authors consent to publication of this Work and authorise the granting of this licence.

1  
2  
3 **The wider collateral damage to children in the UK because of the social distancing measures**  
4 **designed to reduce the impact of COVID-19 in adults.**  
5

6 *Esther Crawley,<sup>1</sup> Maria Loades,<sup>1</sup> Gene Feder,<sup>2</sup> Stuart Logan,<sup>3</sup> Sabi Redwood,<sup>4</sup> John Macleod<sup>2,4</sup>*  
7  
8

9 <sup>1</sup> Bristol Medical School, University of Bristol

10 <sup>2</sup> Centre for Academic Primary Care, Bristol Medical School, Bristol

11 <sup>3</sup> University of Exeter, Exeter

12 <sup>4</sup> ARC West, Bristol  
13

14  
15 *Corresponding Author: Esther Crawley*

16 Centre for Academic Child Health

17 1-5 Whiteladies Road, BS8 1NU

18 Bristol Medical School

19 Esther.crawley@bristol.ac.uk  
20  
21

22 In the UK, Paediatricians are increasingly concerned that parental worries over visiting health care  
23 centres is leading to a drop in vaccination rates and the late presentation of serious illness in  
24 children. This is likely to cause avoidable deaths and illness in the short and long term, a form of  
25 collateral damage from the COVID-19 emergency. In Italy, hospital statistics show a substantial  
26 decrease in paediatric emergency visits compared to the same time in 2018 and 2019 of between 73  
27 and 78%.[1] In April 2020, both the Clinical Commissioning Groups and the Royal College of  
28 Paediatrics and Child Health provided guidance for General Practitioners and paediatricians in  
29 England that the threshold for face to face assessment hospital referrals in children should not  
30 change because of the COVID-19 pandemic.[2] This intervention is welcome, however we remain  
31 concerned about wider, perhaps less immediately visible collateral damage of strategies used  
32 against COVID-19 on vulnerable children.  
33  
34  
35

36 The Cambridge dictionary defines collateral damage is the “unintentional deaths and injuries of  
37 people who are not soldiers, and damage that is caused to their homes, hospitals, schools, etc.” In  
38 the fight against Coronavirus, children are being put at risk, in order to reduce the spread of a  
39 disease that mainly causes direct harm to adults.  
40  
41

42 One of the unique characteristics of the COVID-19 pandemic is the low hospitalisation and mortality  
43 rate (<0.2% for teenagers).[3] However, children are experiencing additional harm due to social  
44 isolation, lack of protective school placements, increased anxiety and a drop in service provision  
45 from both the NHS, education and social services. This is particularly true for the most vulnerable  
46 children (see box 1).  
47  
48

49 **Impact of school closure and social isolation**

50 School closures may have a limited impact on preventing deaths in adults.[4] However, the closure  
51 of schools and confinement to home has multiple impacts on children in terms of education, social  
52 isolation, wellbeing and child protection. Almost all European countries have closed their schools  
53 (Sweden is an exception) to prevent the spread of COVID-19 and according to UNESCO, 91% of  
54 children have been impacted worldwide.[5] Schools throughout the UK closed in March 2020 (see  
55 table 2) and are only providing places for some primary school children of key workers and some  
56 vulnerable children. Uptake of these places in the latter group appears to be low.[6] Some schools  
57 are providing learning online, but completion rates are unknown, particularly for those children with  
58 no or limited access to the internet. Families of children from poorer families have fewer resources,  
59  
60

1  
2  
3 may be reliant on school meals and playgrounds for exercise, are less likely to have appropriate  
4 access to the internet/sufficient space to allow learning, or have access to additional resources to  
5 support other activities for mental or physical well-being. Children with Special Educational Needs  
6 and Disabilities should have the special provision required to meet their particular needs specified in  
7 their Education Health and Care Plan, EHCP. This has not necessarily been adapted for home learning  
8 and many EHCPs specify provision that cannot be delivered outside of specialist settings. Similarly,  
9 much of the wider support normally available to disabled children and other vulnerable learners is  
10 provided through facilities that are now closed and unlikely to be effectively replaced by efforts of  
11 volunteers.

12  
13 Schools provide a safe space for vulnerable children and play a key role in safeguarding by detecting  
14 signs of abuse or neglect. The rapid closure of schools, has not been accompanied by strengthened  
15 processes to support those most in need. This has occurred at the same time that the Coronavirus  
16 Act allows social services to reduce or suspend services (see below) leaving vulnerable children  
17 without a safety net.  
18

19  
20 Social isolation, the withdrawal of peer support, the lack of structure and support from school and  
21 the increased anxiety over COVID-19 infection and risk to parents, are all likely to have a negative  
22 impact on mental health in children and young people.[7] Social isolation and loneliness in children,  
23 job loss, furlough and increased parental distress, may lead to subsequent mental health problems,  
24 resulting in a substantial increase in need for Child and Adolescent Mental Health Services.  
25

26  
27 Increased risk to the mental health of children from social isolation will also result from their  
28 exposure to domestic violence and abuse (DVA) during the pandemic. We know that violence against  
29 women increases during epidemics, such as Ebola.[8, 9] Now, in countries across the world that have  
30 imposed social isolation in response to COVID-19, there is evidence from helplines and police reports  
31 that the incidence and severity of DVA has increased.[10-12] Children confined to home from school  
32 closure and young people not being able to leave home to see their friends will be more exposed to  
33 DVA. The stress and anxiety caused by forced isolation, economic uncertainty, home schooling, and  
34 potentially difficult living conditions, drive the increase in abusive and controlling behaviour. In over  
35 a third of families where DVA occurs, there is also direct child maltreatment: physical and emotional  
36 abuse, exploitation and neglect.[13] The greatest risk will be to vulnerable children (defined in table  
37 1). Although the Government has issued guidance in relation to COVID-19 and DVA, there is no  
38 mention of exposed children and young people.[11] Moreover, as children's services and DVA  
39 agencies scramble to change their working practices to remote support, there is uncertainty about  
40 the effectiveness of emergency methods of working in this field.  
41  
42  
43

#### 44 **Reduction in protection: withdrawal of services**

45  
46 Whilst the risk to children (and particularly vulnerable children) is increasing, the support  
47 mechanisms in both the NHS and social services are being withdrawn.  
48

49 Hospital outpatient clinics have closed, been suspended or moved to virtual home based clinics. This  
50 will have the greatest impact on new appointments, or appointments requiring an examination.  
51 Child and Adolescent Mental health services have reduced or suspended assessment and treatment  
52 clinics in many parts of the UK at a time when children and young people are experiencing higher  
53 levels of anxiety and depression. This is likely to contribute to higher rates of mental health  
54 disorders, self harm and ultimately suicide. The impact is higher on vulnerable children  
55  
56

57 On the 3<sup>rd</sup> of March, the UK government introduced the Coronavirus Bill,[14] which became the  
58 Coronavirus Act on the 25<sup>th</sup> of March 2020. This included changes to the Care Act 2014 in England  
59 and the Social Services and Well-being (Wales) Act 2014 to "enable local authorities to prioritise the  
60

1  
2  
3 *services they offer in order to ensure the most urgent and serious care needs are met, even if this*  
4 *means not meeting everyone's assessed needs in full or delaying some assessments."*[14] These  
5 changes meant that "Local authorities will not have to prepare or review care and support  
6 plans".[15] The intention of the bill was for this to only come into effect if "if demand pressures and  
7 workforce illness during the pandemic meant that local authorities were at imminent risk of failing  
8 to fulfil their duties and only last the duration of the emergency".[15] However, in the absence of  
9 coronavirus testing (which means that many families are self isolating) and with current government  
10 regulations on the movement of people, significant areas of social care have ceased with a  
11 potentially devastating impact on the most vulnerable children.

12  
13  
14  
15 There are over 78,000 looked after children in England alone[16] who are now at higher risk because  
16 of the reduction or suspension of evidenced based protective support and interventions. A variety of  
17 parental interventions, Looked after Children reviews, social services input and respite care can  
18 improve children's outcomes.[17] Throughout the UK, these services have been suspended or  
19 reduced as social services move to working from home meaning that children and foster carers can  
20 no longer access face to face support from their appointed social worker or their independent  
21 reviewing officer. Respite care has generally been suspended, increasing the risk of physical,  
22 emotional abuse or neglect in families that are struggling. Where looked after children were  
23 receiving additional support from CAMHS, this has either stopped or is being continued remotely.  
24 Inevitably these reductions in support and safeguards will have the greatest impact on the children  
25 with the most complex needs in the most challenged placements. Transition planning for children  
26 leaving care has largely been suspended. Services that were already struggling with workforce issues  
27 are now struggling even more as recruitment is almost impossible currently because of practical and  
28 economic considerations.

29  
30  
31  
32 It therefore seems likely that the decisions on social distancing contravene the UN Convention of the  
33 child. This convention states (article 3): "In all actions concerning children, whether undertaken by  
34 public or private social welfare institutions, courts of law, administrative authorities or legislative  
35 bodies, the best interests of the child shall be a primary consideration. We believe that the social  
36 distancing measures introduced in the UK and elsewhere, may marginally reduce the infection rate  
37 in adults but harms children. We do not believe that the "best interest of the child" are the "primary  
38 consideration" and therefore these actions do not comply with this convention.

39  
40  
41  
42 Can we mitigate these effects and minimise the "collateral damage" experienced by children and  
43 young people? Several strategies have been suggested to reduce the risks of domestic violence  
44 including the organisation of safe spaces in hotels for women and children experiencing DVA,  
45 already implemented in Spain and France. Improving video and online access to services for which  
46 there is some evidence of effectiveness (such as CBT from CAMHS) could improve children's  
47 resilience. The chronic underfunding and work-force crisis in social care and the domestic violence  
48 sector will only be exacerbated by the current emergency. The chancellor's recognition of the need  
49 for greater financial support of the NHS [18] should be matched with additional support to local  
50 authorities. CAMHS and social services for children are unlikely to be needed on the front line for  
51 COVID-19 and agile services could develop alternative methods to assess and treat children using  
52 video clinics. The physical and mental health needs of the UK's children are unlikely to be short term,  
53 and funding will need to continue well after the Covid-19 pandemic is over. Perhaps more  
54 importantly, we all have a responsibility to promote the health and well being of children at home,  
55 and to ask questions and fight for service provision in areas where clinicians are not needed to fight  
56 COVID-19, but are needed to protect children.

**Contribution Statement:**

Esther Crawley conceived the idea, supported and developed by John Macleod. Maria Loads, Gene Feder, Stuart Logan and Sabi Redwood all contributed to the first and subsequent drafts. All authors approved the final draft.

**Funding Statement:**

Dr Loades is funded by the National Institute for Health Research (NIHR Doctoral Research Fellowship, DRF-2016-09-021). This report is independent research. The views expressed in this publication are those of the authors(s) and not necessarily those of the NHS, NIHR or the Department of Health and Social Care.

**Table 1: Definitions of Vulnerable Children**

|                                                                                                                                                                                                                                                                                                                                                                                                                                                                                                                                                                                                                                                                                                                                                                                                                                                                                                                                                                                                                                                                                                                                                                                                                                                                                                                                                                                                                                                                                                                                                                                                                                                                                                                                                                                                                                                                                                                                                                                                                                                                                                            |
|------------------------------------------------------------------------------------------------------------------------------------------------------------------------------------------------------------------------------------------------------------------------------------------------------------------------------------------------------------------------------------------------------------------------------------------------------------------------------------------------------------------------------------------------------------------------------------------------------------------------------------------------------------------------------------------------------------------------------------------------------------------------------------------------------------------------------------------------------------------------------------------------------------------------------------------------------------------------------------------------------------------------------------------------------------------------------------------------------------------------------------------------------------------------------------------------------------------------------------------------------------------------------------------------------------------------------------------------------------------------------------------------------------------------------------------------------------------------------------------------------------------------------------------------------------------------------------------------------------------------------------------------------------------------------------------------------------------------------------------------------------------------------------------------------------------------------------------------------------------------------------------------------------------------------------------------------------------------------------------------------------------------------------------------------------------------------------------------------------|
| <p><b>Definitions of Vulnerability taken from The Children’s commissioner Technical Paper 2, defines 7 groups of children as vulnerable.[19]</b></p>                                                                                                                                                                                                                                                                                                                                                                                                                                                                                                                                                                                                                                                                                                                                                                                                                                                                                                                                                                                                                                                                                                                                                                                                                                                                                                                                                                                                                                                                                                                                                                                                                                                                                                                                                                                                                                                                                                                                                       |
| <p><b>1. Formal categories of children in care of the state</b> whether in care, or living in other forms of state provision such as offender institutions, residential special schools, mental health establishments or other forms of hospital</p> <p><b>2. Formal categories of need that may reflect family circumstances</b> such as children receiving Free School Meals or Children in Need, and asylum seeking children</p> <p><b>3. Categories of need that reflect features of child development</b> such as children in Pupil Referral Units or with Special Education Needs and Disability. These groups might also include wider categories such as children subject to assessment or supervision under the Children Act, children subject to court orders or in receipt of youth justice services and missing children</p> <p><b>4. Children who are in receipt of services following assessment</b> even if they do not have a formal status. For instance, those with a CAHMS service but with no formal diagnosis, those receiving prevention services through children’s care, or youth justice, all of whom have been assessed by statutory agencies as vulnerable in some manner</p> <p><b>5. Informal types of vulnerability</b> that may be important to the practice of local agencies such as for example when a child is referred to CAMHS who does not reach the threshold required to access services but where unmet need and vulnerability may still exist, or a child identified as part of a family experiencing domestic violence and abuse</p> <p><b>6. Definitions relating to national policy such as ‘troubled families’ or ‘just about managing’ families.</b> This category will often relate closely to other categories and where children are identified as in need of support through such mechanisms they are in scope of this review</p> <p><b>7. Scientific and academic literature</b> on risk and resilience such as Sameroff (2005), Rutter (2012), and including tools and approaches such as the measurement of adverse childhood experiences (ACEs)</p> |
| <p><b>UK Government definition of Vulnerable Children and Young people[20]</b></p>                                                                                                                                                                                                                                                                                                                                                                                                                                                                                                                                                                                                                                                                                                                                                                                                                                                                                                                                                                                                                                                                                                                                                                                                                                                                                                                                                                                                                                                                                                                                                                                                                                                                                                                                                                                                                                                                                                                                                                                                                         |
| <ul style="list-style-type: none"> <li>• are assessed as being in need under section 17 of the Children Act 1989, including children who have a child in need plan, a child protection plan or who are a looked after child</li> <li>• have an education, health and care (EHC) plan whose needs cannot be met safely in the home environment</li> <li>• have been assessed as otherwise vulnerable by educational providers or local authorities (including children’s social care services), and who are therefore in need of continued education provision</li> </ul> <p>“This might include children on the edge of receiving support from children’s social care services, adopted children, or those who are young carers, and others at the provider and local authority discretion.”</p>                                                                                                                                                                                                                                                                                                                                                                                                                                                                                                                                                                                                                                                                                                                                                                                                                                                                                                                                                                                                                                                                                                                                                                                                                                                                                                           |

**Table 2: What restrictions have been placed because of social distancing on children and young people in the UK? [Government guidance updated 29<sup>th</sup> March 2020]**

|                                                                                                                                                                              |
|------------------------------------------------------------------------------------------------------------------------------------------------------------------------------|
| <p>1. Children and young people are not allowed to attend school, college, nurseries unless they are a vulnerable child defined according to the government (see above).</p> |
|------------------------------------------------------------------------------------------------------------------------------------------------------------------------------|



- |                                                                                                                                                    |
|----------------------------------------------------------------------------------------------------------------------------------------------------|
| 2. Children and young people are allowed “one form of exercise a day, for example a run, walk, or cycle – alone or with members of your household” |
| 3. Where parents do not live in the same household, children under 18 can be moved between their parents homes                                     |
| 4. All public gatherings of more than two people are stopped (including weddings, baptisms and other religious ceremonies).                        |

## REFERENCES

1. Lazzerini, M., et al., *Delayed access or provision of care in Italy resulting from fear of COVID-19*. *Lancet Child Adolesc Health*, 2020.
2. Health, R.C.o.P.a.C. *Delayed access to care for children during COVID-19: our role as paediatricians - position statement*. 2020; Available from: <https://www.rcpch.ac.uk/resources/delayed-presentation-during-covid-19-position>.
3. Choi, S.H., et al., *Epidemiology and Clinical Features of Coronavirus disease 2019 in Children*. *Clin Exp Pediatr*, 2020.
4. Viner, R.M., et al., *School closure and management practices during coronavirus outbreaks including COVID-19: a rapid systematic review*. *Lancet Child Adolesc Health*, 2020.
5. UNESCO, *COVID-19 Educational disruption and Response*. 2020. <https://en.unesco.org/covid19/educationresponse>
6. *Low attendance at scaled-down schools sparks fears for vulnerable pupils* in *The Guardian* 2020. <https://www.theguardian.com/world/2020/mar/23/parents-heeding-calls-to-keep-children-home-from-school-say-heads>
7. Sprang, G. and M. Silman, *Posttraumatic stress disorder in parents and youth after health-related disasters*. *Disaster Med Public Health Prep*, 2013. **7**(1): p. 105-10.
8. Caspani, M., *Violence against women rises in Ebola-hit nations: ministers*, in *Reuters*. 2015. <https://www.reuters.com/article/us-health-ebola-women/violence-against-women-rises-in-ebola-hit-nations-ministers-idUSKBN0ME30520150318>
9. Onyango, M.A.R., K; Davis, A; Shah, R.R., *Gender-Based violence Among Adolescent Girls and Young Women: A Neglected consequence of the West African Ebola Outbreak.*, in *Pregnant in the Time of Ebola: Women and Their children in the 2013-2015 West African Epidemic*, D.A. Schwartz, J.N; Abramowitz, S.A., Editor. 2019, Springer International publishing.
10. *Lockdowns around the world bring rise in domestic violence*, in *The Guardian*. <https://www.theguardian.com/society/2020/mar/28/lockdowns-world-rise-domestic-violence>
11. *In quarantine with an abuser; urge in domestic violence reports linked to coronavirus*, in *The Guardian*. <https://www.theguardian.com/us-news/2020/apr/03/coronavirus-quarantine-abuse-domestic-violence>
12. *Domestic abuse cases soar as lockdown takes its toll*, in *The Guardian*. 2020. [https://www.theguardian.com/world/2020/apr/04/domestic-abuse-cases-soar-as-lockdown-takes-its-toll?CMP=Share\\_AndroidApp\\_Outlook](https://www.theguardian.com/world/2020/apr/04/domestic-abuse-cases-soar-as-lockdown-takes-its-toll?CMP=Share_AndroidApp_Outlook)
13. Hamby, S., et al., *The overlap of witnessing partner violence with child maltreatment and other victimizations in a nationally representative survey of youth*. *Child Abuse Negl*, 2010. **34**(10): p. 734-41.
14. *What the Coronavirus Bill will do*, D.o.H.a.S. Care, Editor. 2020. <https://www.gov.uk/government/publications/coronavirus-bill-what-it-will-do/what-the-coronavirus-bill-will-do>
15. *Care Act easements: guidance for local authorities* D.o.H.a.S. Care, Editor. <https://www.gov.uk/government/publications/coronavirus-covid-19-changes-to-the-care-act-2014/care-act-easements-guidance-for-local-authorities>

- 1
  - 2
  - 3
  - 4
  - 5
  - 6
  - 7
  - 8
  - 9
  - 10
  - 11
  - 12
  - 13
  - 14
  - 15
  - 16
  - 17
  - 18
  - 19
  - 20
  - 21
  - 22
  - 23
  - 24
  - 25
  - 26
  - 27
  - 28
  - 29
  - 30
  - 31
  - 32
  - 33
  - 34
  - 35
  - 36
  - 37
  - 38
  - 39
  - 40
  - 41
  - 42
  - 43
  - 44
  - 45
  - 46
  - 47
  - 48
  - 49
  - 50
  - 51
  - 52
  - 53
  - 54
  - 55
  - 56
  - 57
  - 58
  - 59
  - 60
16. Statistics, N., *Children looked after in England (including adoption), year ending 31 March 2019*, D.f. Education, Editor. 2019.
17. Lester, S.L., T; sutcliffe, K; Khatwa,M; Sowden,A; , *What helps to support people affected by Adverse Childhood Experiences? A Review of Evidence*. 2019, . London: EPPI-Centre, Social Science Research Unit, UCL Institute of Education, University College London.
18. Gov.UK, *NHS to benefit from £13.4 billion debt write-off: Press release*. 2020.
19. Bright, C., *Defining child vulnerability: Definitions, frameworks and groups*, C.s.c.f. England, Editor. 2017.
20. *Supporting vulnerable children and young people during the coronavirus (COVID-19) outbreak*, D.o. Education, Editor. 2020.

Confidential: For Review Only
